# Supplementary material for: Identification of Therapeutic Targets and Prognostic Biomarkers Among CXC Chemokines in the Renal Cell Carcinoma Microenvironment
Source: PubMed Central journal article supplement (PMC7012904; doi:10.3389/fonc.2019.01555), 2020-02-05
Supplement: Image_1.pdf [file Image_1.pdf]

## Supplementary Material

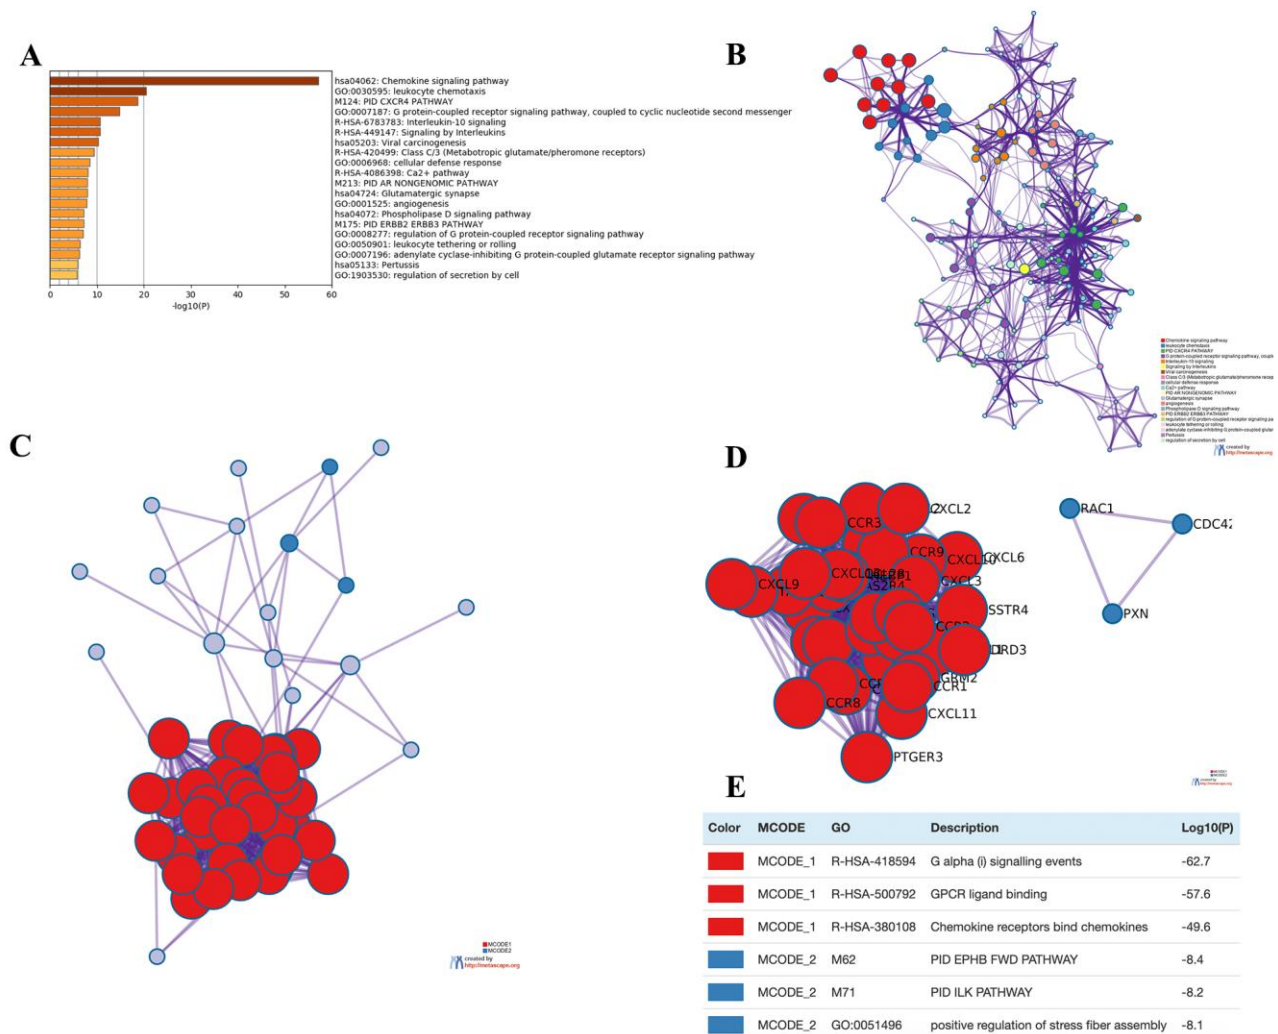

**Supplementary Figure 1.** The enrichment analysis of different expressed CXC chemokines and 50 most frequently altered neighboring genes in RCC (Metascape). (A) Bar graph of top 20 enriched terms across different expressed CXC chemokines and 50 most frequently altered neighboring genes, colored by  $p$  values. (B) Network of enriched terms, colored by cluster ID. (C, D and E) Protein-protein interaction network and MCODE components identified in different expressed CXC chemokines and 50 most frequently altered neighboring genes.
